# Supplementary material for: A montmorillonite-modification strategy enabling long cycling stability of dual-ion batteries
Source: Royal Society of Chemistry journal article supplement (doi:10.1039/d2cc04552d), 2022-01-01
Supplement: d2cc04552d1.pdf [file d2cc04552d1.pdf]

## Electronic Supplementary Information

for:

### A Montmorillonite-Modification Strategy Enabling Long Cycling Stability of Dual-Ion Batteries

Gen Li,<sup>a</sup> Huanwen Wang,<sup>\*ab</sup> Xiaojun Shi,<sup>a</sup> Caihong Yang,<sup>ab</sup> Rui Wang,<sup>a</sup> Beibei He,<sup>a</sup> Jun Jin,<sup>a</sup> Yansheng  
Gong,<sup>a</sup> Aidong Tang<sup>abc</sup> and Huaming Yang<sup>\*abcd</sup>

a. Engineering Research Center of Nano-Geomaterials of Ministry of Education, Faculty of Materials Science and Chemistry, China University of Geosciences, Wuhan, China. E-mail: [wanghw@cug.edu.cn](mailto:wanghw@cug.edu.cn)

b. Key Laboratory of Functional Geomaterials in China Nonmetallic Minerals Industry, China University of Geosciences, Wuhan, China.

c. College of Chemistry and Chemical Engineering, Central South University, Changsha, China.

d. Hunan Key Lab of Mineral Materials and Application, School of Minerals Processing and Bioengineering, Central South University, Changsha, China. E-mail: [hmyang@csu.edu.cn](mailto:hmyang@csu.edu.cn)

## Experimental Section

**Preparation of Li-MMT.** Firstly, commercial calcium-based montmorillonite and  $\text{Li}_2\text{CO}_3$  (Sigma-Aldrich) were added to distilled water in a mass ratio of 50:3, stirred at 60 °C for 12 h, followed by centrifugation and finally drying at 100 °C for 12 h.

**Materials Characterization.** The samples were characterized by field-emission SEM (Hitachi SU8010), XRD (Bruker AXS D8-Focus, Cu), TEM (SUPRA 55, Germany), TGA (STA449F3) and XPS (ESCALAB 250XI). The energy-dispersive X-ray spectroscopy (EDX) mapping images of electrodes were collected using the JEOL-2100F Plus.

**Preparation of Cathodes.** MCMB and Li-MMT were firstly mixed by ultrasonic stirring in alcohol at a mass ratio of 8:1, and then dried at 80°C to obtain the MCMB@MMT. The samples with MCMB and MMT mass ratio of 5:1 were also treated in the same way. The cathode slurry was made by mingling 80wt% sample, 10wt% carbon black, 10wt% polyvinylidene fluoride (PVDF, Sigma Aldrich, purity >99%) in N-methyl-2-pyrrolidone (NMP, Sigma Aldrich, purity >99%), which was then casted on an aluminum foil and then dried at 100°C for 12 hours.

**Electrochemical Measurements.** The working electrode and Li foil were separated with a polypropylene membrane as the separator. Galvanostatic charge–discharge (GCD) was measured using a battery test system (Wuhan Landian Electronic Co., Ltd., China). CV were performed with a CHI660C electrochemical workstation. EIS was recorded on a Gamry Reference 3000. The electrolyte is 4 M  $\text{LiPF}_6$  in EMC.

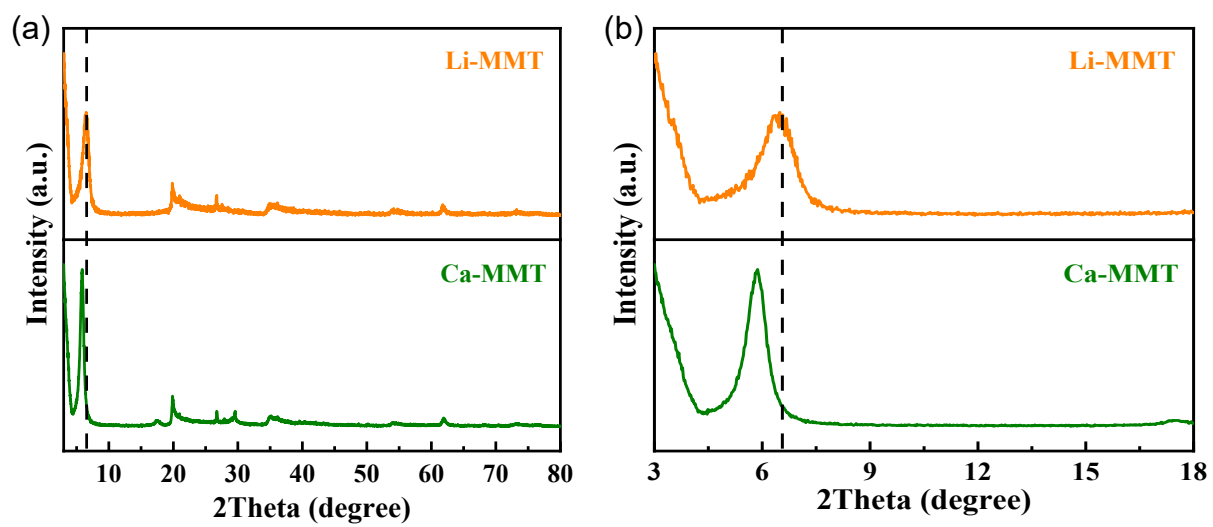

**Figure S1.** XRD patterns of Li-MMT and Ca-MMT.

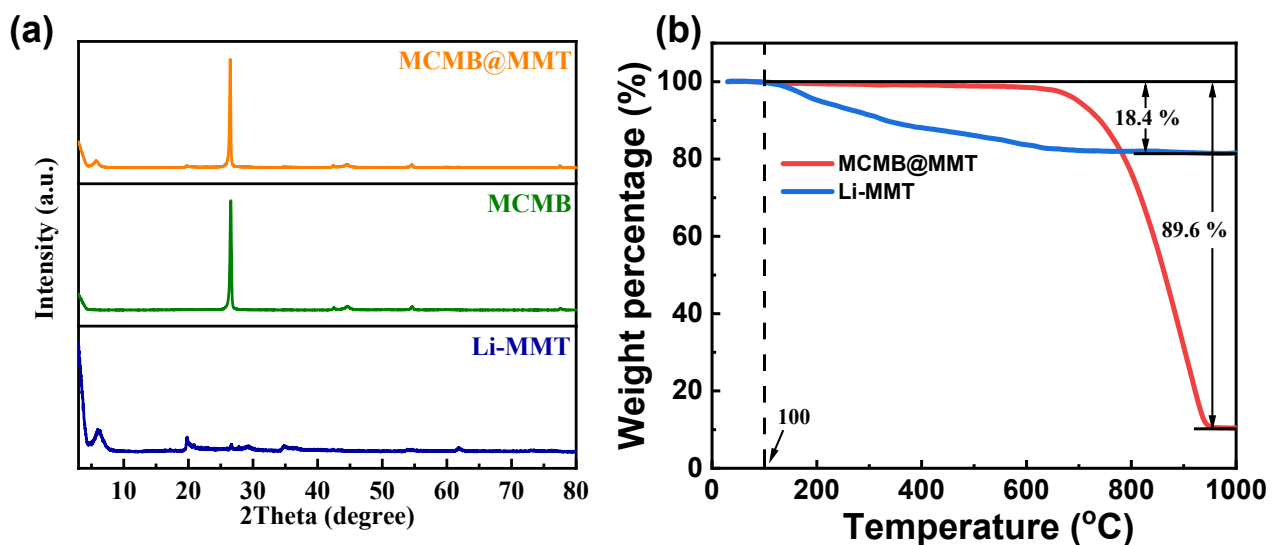

**Figure S2.** (a) XRD patterns of MCMB@MMT, MCMB and Li-MMT. (b) TGA and DSC curves of the MCMB@MMT and Li-MMT.

The TGA analysis indicates that the weight loss (18.4%) of MMT from 100 °C to 600 °C is mainly from the interlayer water and surface functional groups of MMT. MCMB@MMT shows the weight loss of 89.6% after 650 °C due to the combustion of MCMB and the decomposition of MMT. By calculation, the weight percent of MMT in the MCMB@MMT composite is determined to be 12.7% (Figure 2b, ESI<sup>†</sup>).

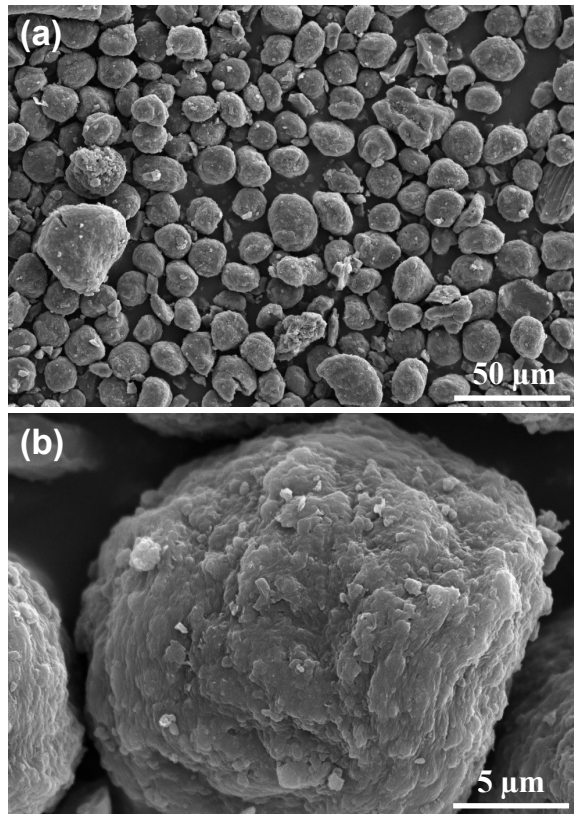

**Figure S3.** SEM image of MCMB.

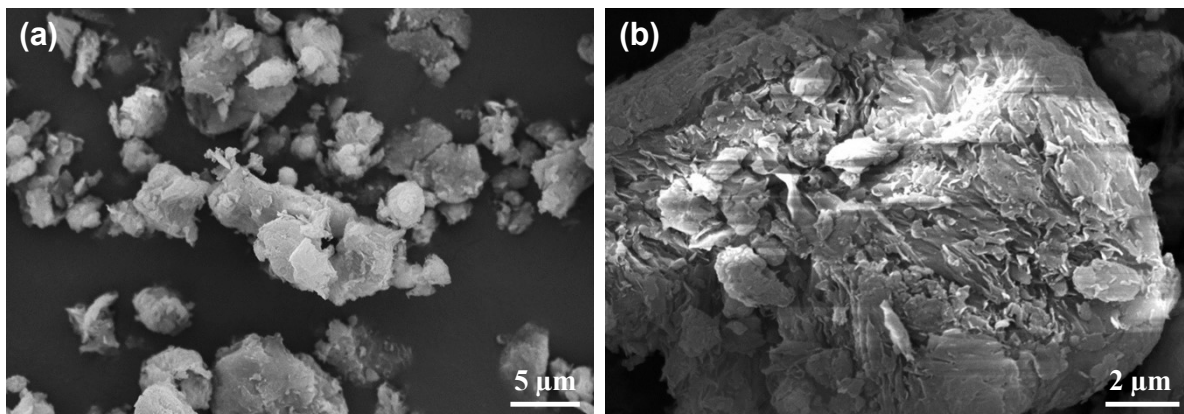

**Figure S4.** SEM image of Ca-MMT.

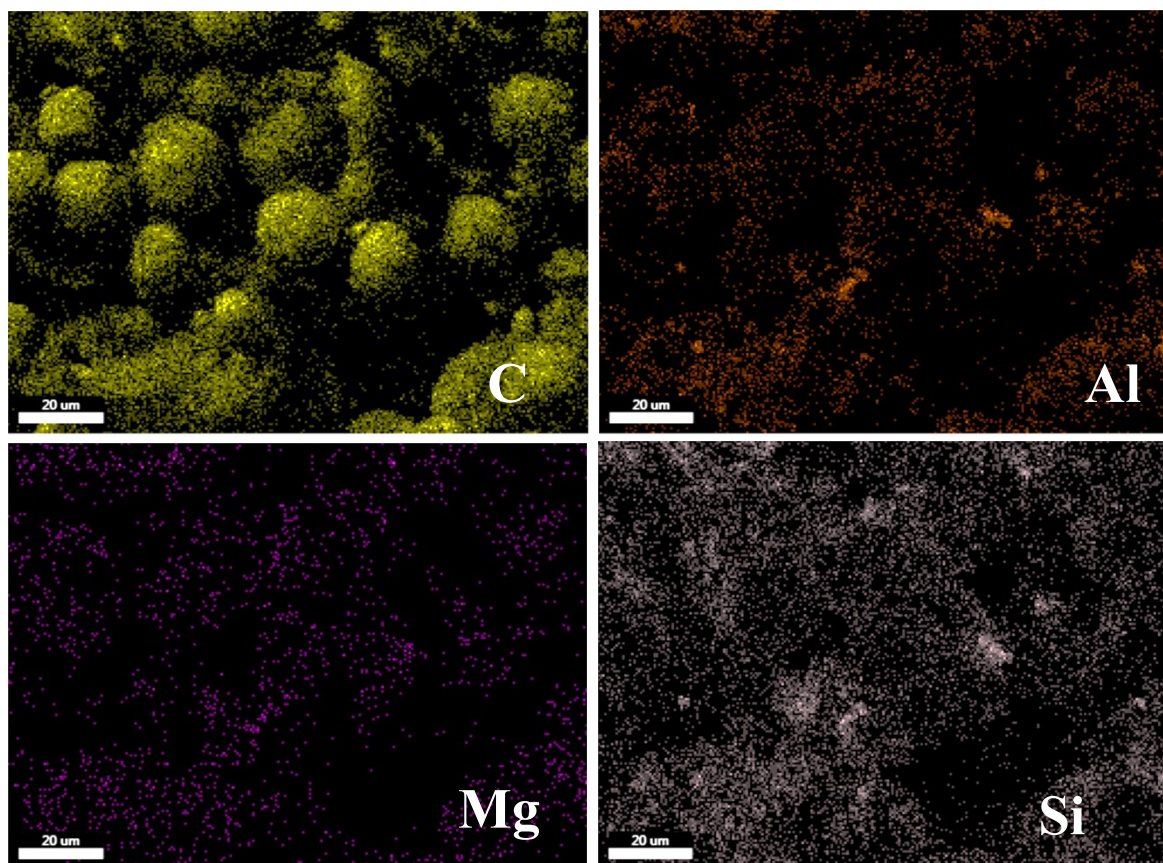

**Figure S5.** Element mappings of MCMB@MMT of C, Al, Mg, and Si.

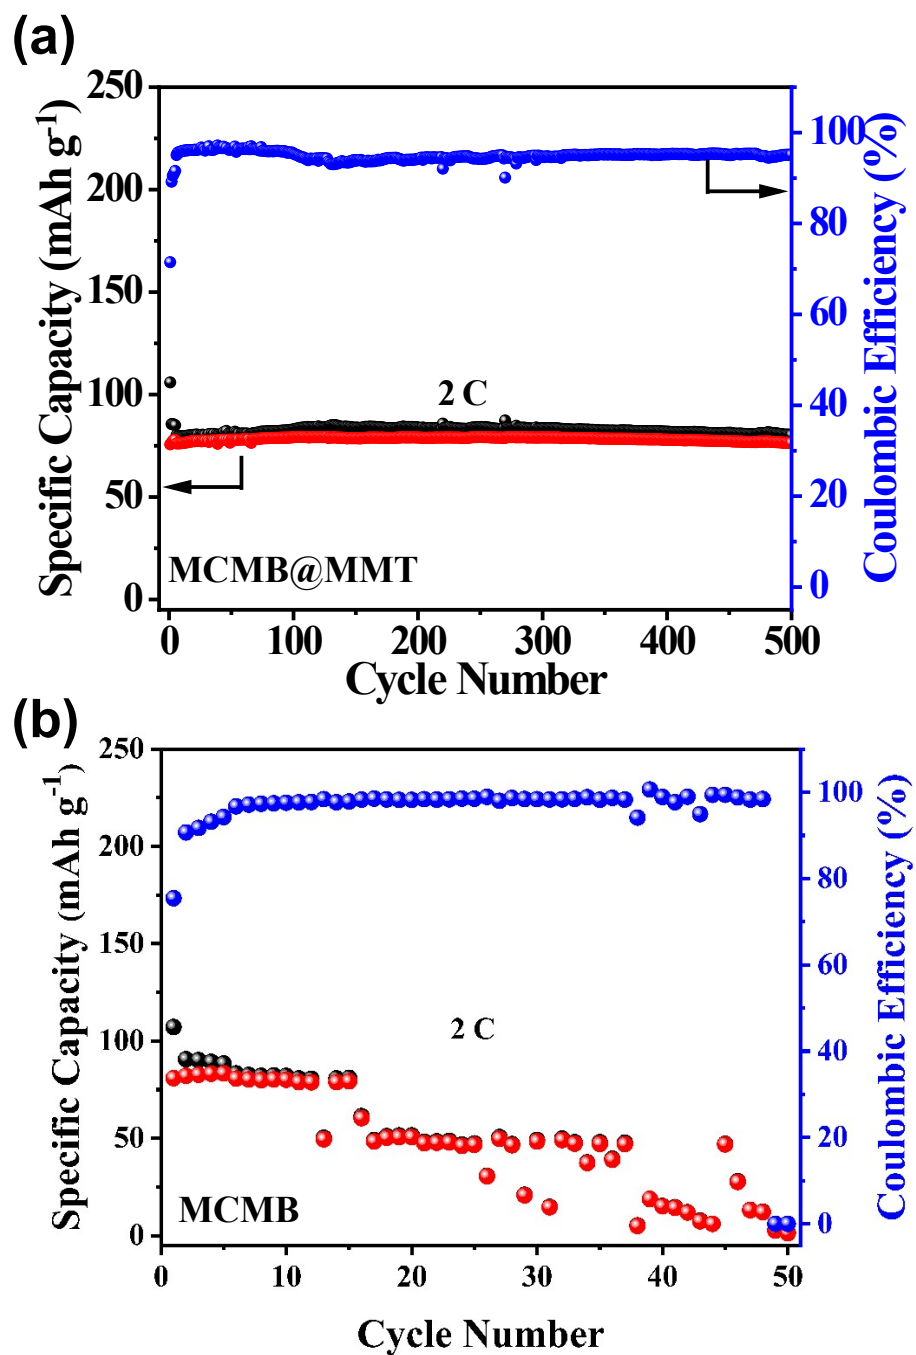

Figure S6. Cycling performance of (a) MCMB@MMT and (b) MCMB at a rate of 2 C.

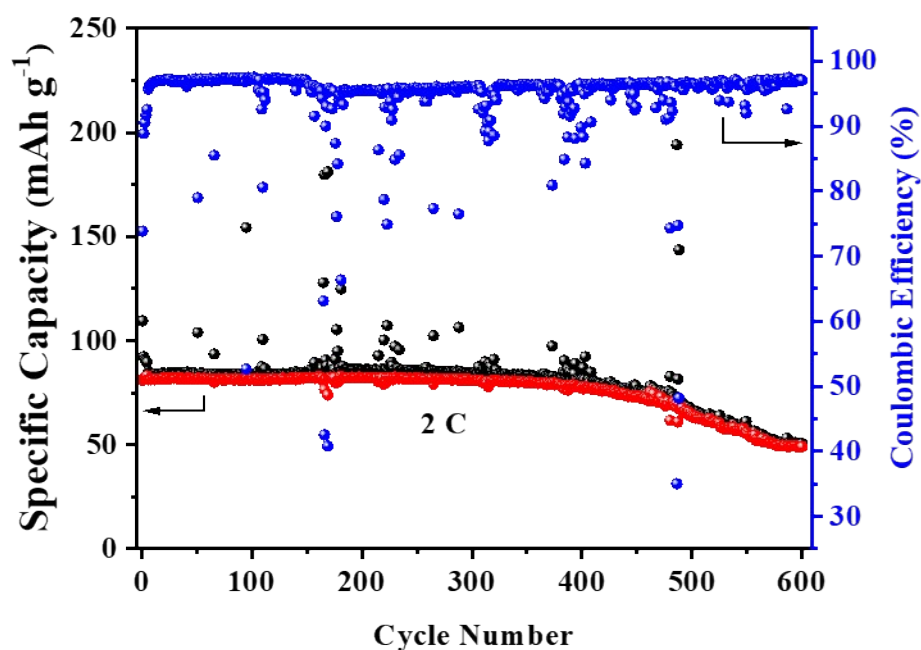

**Figure S7.** Cycling performance MCMB@MMT of at 2 C with the mass ratio (15 : 1) of MCMB and MMT.

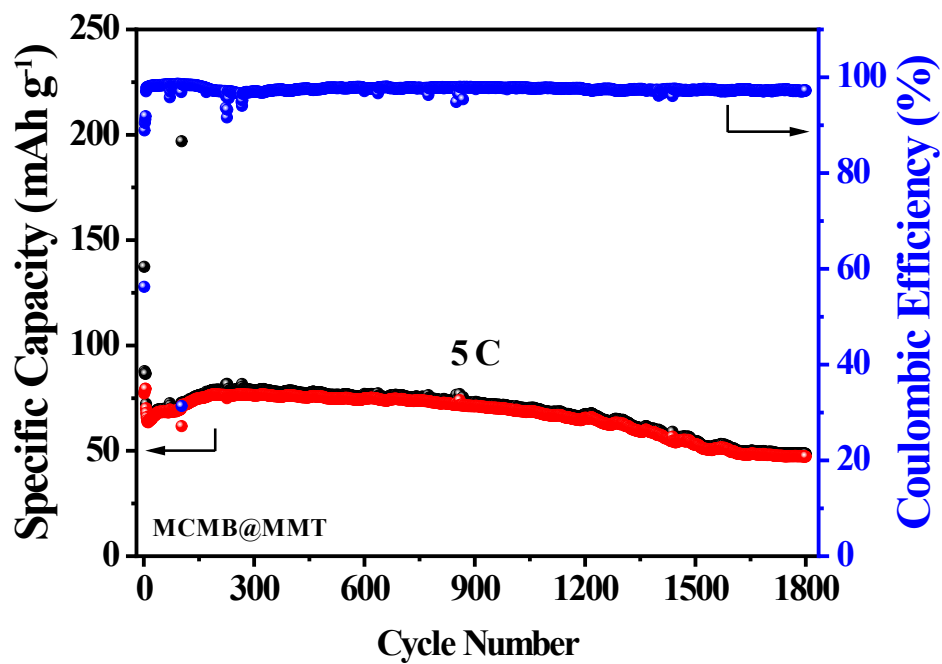

**Figure S8.** Long-term cycling performance of MCMB@MMT at a rate of 5 C.



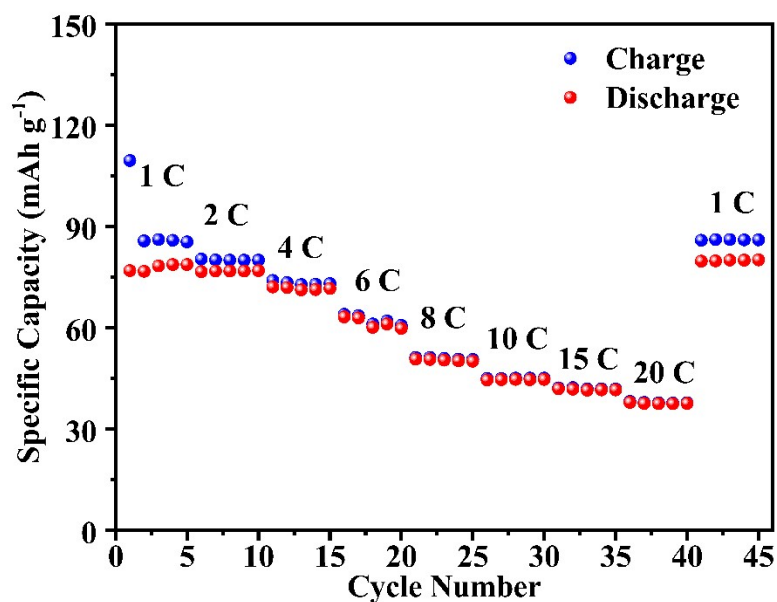

Figure S9. Rate capability of the MCMB@MMT cathode.

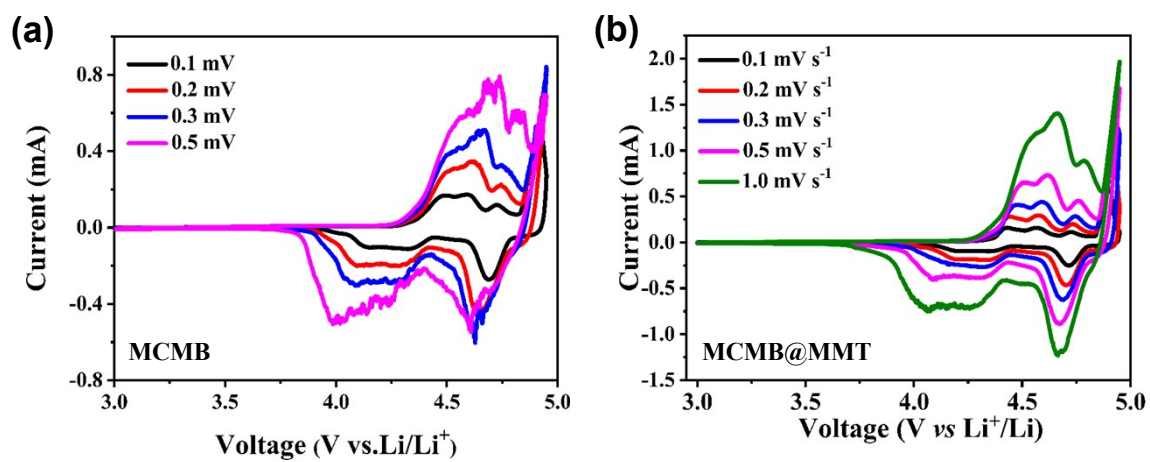

Figure S10. CV curves of (a) MCMB and (b) MCMB@MMT at various scan rates.

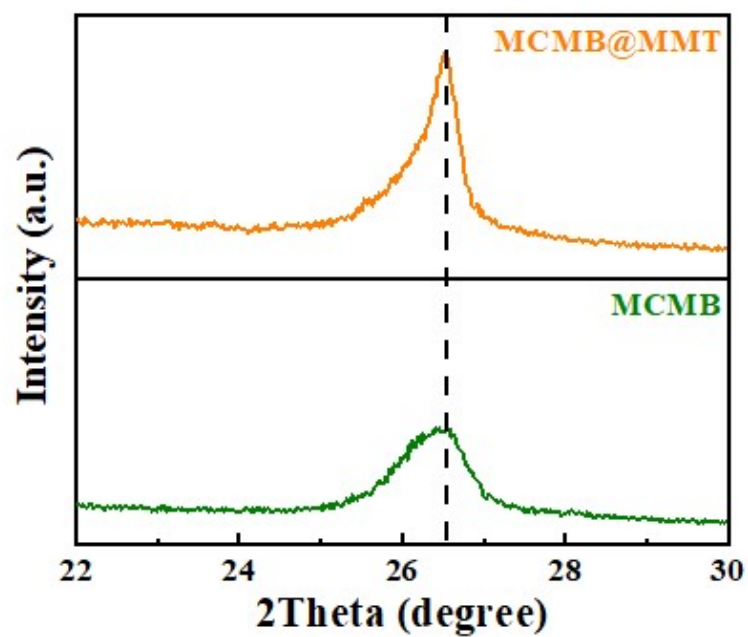

**Figure S11.** XRD patterns of the MCMB and MCMB@MMT electrodes after 50 cycles at 2 C.

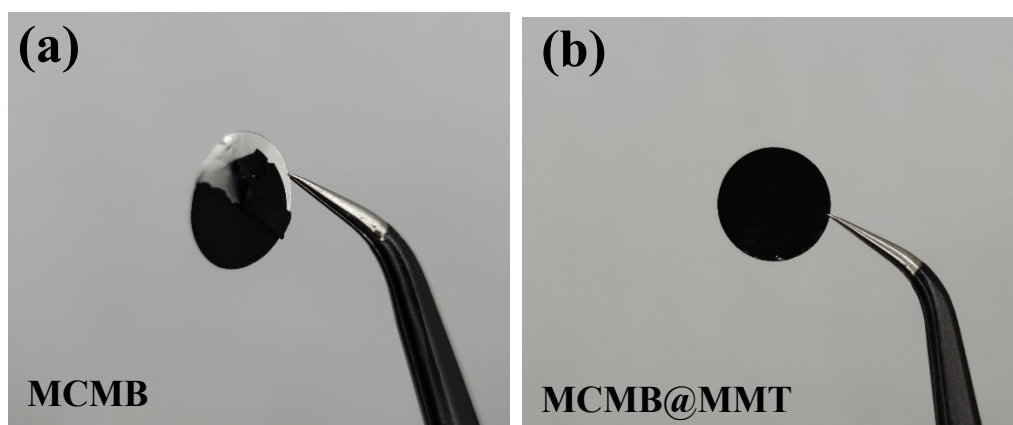

**Figure S12.** Photographs of the MCMB and MCMB@MMT electrodes after 50 cycles at 2 C.

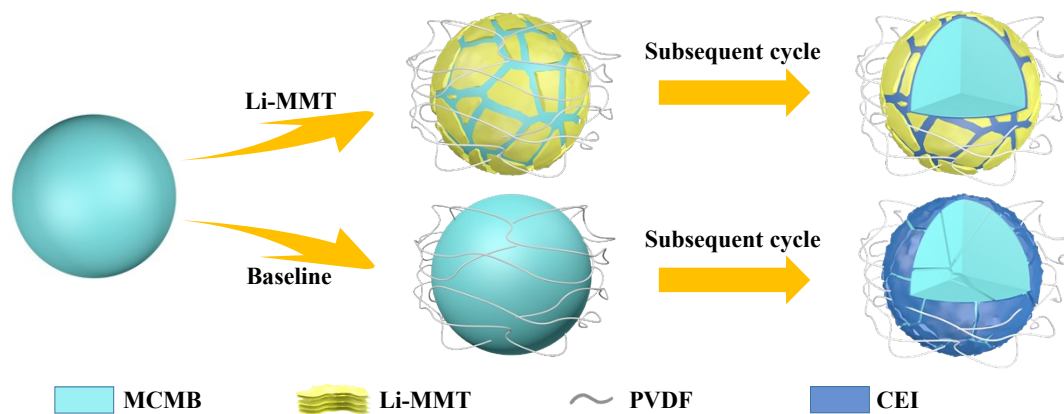

**Figure S13.** Illustration of the evolution of CEI during cycling with and without the MMT additive.
